# Supplementary material
Source: publisher site journal article supplement (http://www.kjim.org/upload/media/kjim-2017-332-suppl1.pdf)
Supplement: Supplementary file 1 [file kjim-2017-332-suppl1.pdf]

**Supplementary Table 1. Annual consumption of antimicrobial agents for systemic use at intensive care units (unit: DDD/1,000 patient-days)**

|                                          | 2004     | 2005     | 2006     | 2007     | 2008     | 2009     | 2010     | 2011     | 2012     | 2013     | Total    | Coefficient for time | p value |
|------------------------------------------|----------|----------|----------|----------|----------|----------|----------|----------|----------|----------|----------|----------------------|---------|
| <b>Broad-spectrum antibiotics</b>        |          |          |          |          |          |          |          |          |          |          |          |                      |         |
| 3rd CEPs                                 | 363.45   | 375.46   | 435.88   | 521.59   | 462.94   | 345.24   | 320.27   | 199.90   | 167.89   | 154.35   | 336.10   | -2.644               | < 0.001 |
| 4th CEPs                                 | 19.04    | 38.98    | 17.55    | 19.38    | 51.45    | 40.91    | 69.48    | 90.56    | 87.46    | 76.89    | 50.76    | 0.670                | < 0.001 |
| BL/BLIs                                  | 157.49   | 202.47   | 198.77   | 81.42    | 71.97    | 97.91    | 69.18    | 202.35   | 261.71   | 386.28   | 172.71   | 1.257                | < 0.001 |
| FQs                                      | 194.62   | 186.04   | 177.27   | 181.49   | 191.01   | 245.03   | 213.68   | 211.27   | 223.33   | 281.34   | 210.26   | 0.692                | < 0.001 |
| Subtotal                                 | 734.59   | 802.95   | 829.46   | 803.88   | 777.38   | 729.10   | 672.61   | 704.07   | 740.39   | 898.86   | 769.84   | -0.024               | 0.941   |
| <b>Antibiotics against MDR pathogens</b> |          |          |          |          |          |          |          |          |          |          |          |                      |         |
| Carbapenems                              | 8.45     | 47.00    | 172.99   | 125.71   | 75.04    | 93.05    | 85.91    | 81.88    | 69.21    | 67.72    | 82.11    | 0.076                | 0.650   |
| Glycopeptides                            | 117.46   | 106.06   | 124.02   | 102.35   | 96.31    | 90.69    | 82.68    | 86.93    | 94.11    | 87.65    | 99.00    | -0.292               | 0.001   |
| Oxazolidinone                            | 2.15     | 3.20     | 9.08     | 9.31     | 10.51    | 6.64     | 6.52     | 21.18    | 13.55    | 7.20     | 8.80     | 0.081                | 0.011   |
| Polymyxin                                | 0.20     | 0        | 4.73     | 44.51    | 43.01    | 27.24    | 21.19    | 87.21    | 53.90    | 52.86    | 32.88    | 0.582                | < 0.001 |
| Tigecycline                              | 0        | 0        | 0        | 0        | 0        | 10.91    | 34.27    | 3.00     | 9.89     | 24.95    | 8.21     | 0.208                | < 0.001 |
| Subtotal                                 | 128.25   | 156.26   | 310.82   | 281.88   | 224.87   | 228.53   | 230.57   | 280.20   | 240.66   | 240.39   | 231.00   | 0.655                | 0.011   |
| <b>Nonbroad-spectrum antibiotics</b>     |          |          |          |          |          |          |          |          |          |          |          |                      |         |
| 1st CEPs                                 | 25.67    | 20.55    | 23.79    | 19.26    | 19.19    | 49.61    | 72.37    | 78.27    | 74.27    | 76.67    | 45.46    | 0.649                | < 0.001 |
| 2nd CEPs                                 | 40.43    | 44.59    | 48.51    | 41.77    | 48.01    | 64.97    | 47.85    | 66.35    | 58.42    | 76.44    | 53.53    | 0.281                | < 0.001 |
| AGs                                      | 360.45   | 374.30   | 416.66   | 383.19   | 226.81   | 159.62   | 115.56   | 48.89    | 31.19    | 58.97    | 219.88   | -3.953               | < 0.001 |
| Lincosamides                             | 55.28    | 74.34    | 110.28   | 88.21    | 103.44   | 93.66    | 88.40    | 77.96    | 82.18    | 47.68    | 82.09    | -0.104               | 0.312   |
| Macrolides                               | 46.18    | 14.97    | 23.70    | 30.71    | 7.53     | 13.48    | 6.61     | 5.98     | 24.90    | 15.66    | 19.14    | -0.176               | 0.005   |
| Metronidazole                            | 75.13    | 83.73    | 94.12    | 65.64    | 70.67    | 69.39    | 70.37    | 71.93    | 53.38    | 59.36    | 71.39    | -0.204               | 0.011   |
| Monobactam                               | 6.70     | 7.41     | 16.93    | 7.24     | 1.43     | 4.60     | 0        | 0        | 0        | 0        | 4.47     | -0.106               | < 0.001 |
| Penicillins                              | 11.44    | 33.63    | 3.38     | 29.47    | 7.62     | 1.79     | 14.79    | 53.61    | 22.04    | 54.32    | 22.96    | 0.269                | 0.026   |
| Tetracyclines                            | 39.90    | 16.19    | 12.67    | 2.99     | 4.42     | 0.00     | 0.00     | 0.84     | 9.75     | 8.15     | 9.69     | -0.187               | 0.002   |
| SXT                                      | 2.77     | 32.01    | 39.04    | 51.74    | 23.90    | 32.65    | 66.75    | 51.46    | 53.21    | 36.59    | 38.71    | 0.271                | 0.044   |
| Subtotal                                 | 663.94   | 701.74   | 789.10   | 720.22   | 513.02   | 489.77   | 482.71   | 455.28   | 409.34   | 433.85   | 567.32   | -3.259               | < 0.001 |
| Total                                    | 1,526.78 | 1,660.95 | 1,929.38 | 1,805.98 | 1,515.27 | 1,447.40 | 1,385.89 | 1,439.56 | 1,390.39 | 1,573.10 | 1,568.16 | -2.629               | < 0.001 |

Coefficient for time and p value were extracted from a linear regression model using measures on a monthly basis.

DDD, defined daily dose; CEP, cephalosporin; BL, β-lactam; BLI, β-lactamase inhibitor; FQ, fluoroquinolone; MDR, multidrug-resistant; AG, aminoglycoside; SXT, trimethoprim/sulfamethoxazole.
